# Supplementary material
Source: publisher figshare collection journal article supplement (https://karger.figshare.com/ndownloader/files/28453311)
Supplement: Supplementary file 1 [file 28453311]

**Fig s2. Conjugated bilirubin changes**


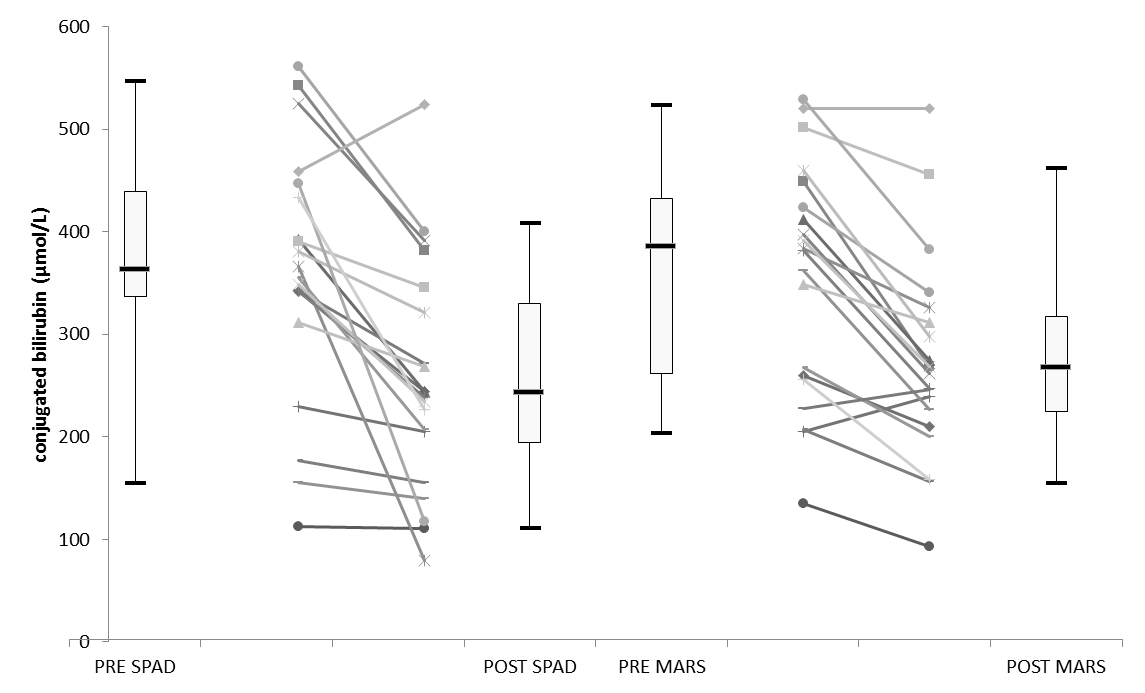


*

*


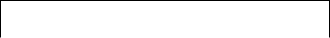


NS


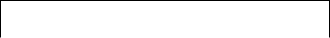

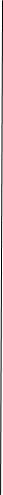

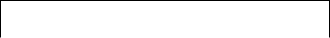


Changes in conjugated bilirubin in both extracorporeal albumin dialysis (ECAD) devices. Box plots represent overall values including all performed ECAD cycles (5th, 25th, 75th, 95th percentile), and bounded dots mark changes of each individual ECAD session. MARS molecular adsorbents recirculating system, SPAD single-pass albumin dialysis, *: p< 0.05, NS: non-significant difference.
